# Supplementary material for: Syntheses of novel di- and trinucleating ligands having a triethylbenzene core with N,N-bidentate tethers: their complexation toward Pd and Rh organometallic fragments
Source: Royal Society of Chemistry journal article supplement (doi:10.1039/b713503c), 2008-01-01
Supplement: b713503c.pdf [file b713503c.pdf]

## List of Supplementary Information

### Syntheses of Novel Di- and Trinucleating Ligands having Triethylbenzene Core with N,N-Bidentate Tethers.

### Their Complexation toward Pd and Rh Organometallic Fragments.

Gou Higashihara, Akiko Inagaki, Munetaka Akita\*

*Chemical Resources Laboratory, Tokyo Institute of Technology, RI-27, 4259  
Nagatsuta, Midori-ku, Yokohama 226-8503, Japan.*

|                                                                             |     |
|-----------------------------------------------------------------------------|-----|
| Experimental procedures for X-ray crystallography ( $L^{pypz3}$ )           | S2  |
| Experimental procedures for X-ray crystallography ( <b>1</b> )              | S4  |
| Experimental procedures for X-ray crystallography ( <b>2</b> )              | S6  |
| Table S1. Crystallographic Data for $L^{pypz3}$ , <b>1</b> , and <b>2</b> . | S9  |
| Table S2. Bond lengths [Å] for $L^{pypz3}$                                  | S10 |
| Table S3. Bond angles [deg] for $L^{pypz3}$ .                               | S11 |
| Table S4. Bond lengths [Å] for <b>1</b> .                                   | S12 |
| Table S5. Bond angles [deg] for <b>1</b> .                                  | S14 |
| Table S6. Bond lengths [Å] for <b>2</b> .                                   | S17 |
| Table S7. Bond angles [deg] for <b>2</b> .                                  | S19 |

Experimental procedures for X-ray crystallography ( $L^{PVPZ^3}$ ).

### Data Collection

A white prism crystal of  $C_{39}H_{39}N_9$  having approximate dimensions of 0.20 x 0.10 x 0.10 mm was mounted on a glass fiber. All measurements were made on a Rigaku RAXIS IV imaging plate area detector with graphite monochromated Mo- $K\alpha$  radiation.

Indexing was performed from 3 oscillations that were exposed for 180 seconds. The crystal-to-detector distance was 110.00 mm.

Cell constants and an orientation matrix for data collection corresponded to a primitive monoclinic cell with dimensions:

$$\begin{aligned} a &= 11.3126(6) \text{ \AA} \\ b &= 26.386(2) \text{ \AA} & \beta &= 109.579(4)^\circ \\ c &= 12.2108(10) \text{ \AA} \\ V &= 3434.1(5) \text{ \AA}^3 \end{aligned}$$

For  $Z = 4$  and F.W. = 633.80, the calculated density is  $1.226 \text{ g/cm}^3$ . The systematic absences of:

$$h0l: h+1 \pm 2n$$

$$0k0: k \pm 2n$$

uniquely determine the space group to be:

$$P2_1/n \text{ (#14)}$$

The data were collected at a temperature of  $-60 \pm 1^\circ\text{C}$  to a maximum  $2\theta$  value of  $55.0^\circ$ . A total of 60 oscillation images were collected. A sweep of data was done using  $\omega$  oscillations from  $0.0$  to  $180.0^\circ$  in  $3.0^\circ$  steps. The exposure rate was  $499.8 \text{ [sec./}^\circ\text{]}$ . The crystal-to-detector distance was 110.00 mm. Readout was performed in the 0.100 mm pixel mode.

### Data Reduction

Of the 26954 reflections that were collected, 7758 were unique ( $R_{\text{int}} = 0.061$ ).

The linear absorption coefficient,  $\mu$ , for Mo- $K\alpha$  radiation is  $0.756 \text{ cm}^{-1}$ . The data were corrected for Lorentz and polarization effects. A correction for secondary extinction<sup>1</sup> was applied (coefficient = 0.037500).

### Structure Solution and Refinement

The structure was solved by direct methods<sup>2</sup> and expanded using Fourier techniques<sup>3</sup>. The non-hydrogen atoms were refined anisotropically. Hydrogen atoms were refined isotropically. The

final cycle of full-matrix least-squares refinement<sup>4</sup> on  $F^2$  was based on 7758 observed reflections and 591 variable parameters and converged (largest parameter shift was 0.03 times its esd) with unweighted and weighted agreement factors of:

$$R1 = \Sigma ||F_o| - |F_c|| / \Sigma |F_o| = 0.0457$$
$$wR2 = [ \Sigma ( w (F_o^2 - F_c^2)^2 ) / \Sigma w(F_o^2)^2 ]^{1/2} = 0.1221$$

The standard deviation of an observation of unit weight<sup>5</sup> was 1.03. Unit weights were used. The maximum and minimum peaks on the final difference Fourier map corresponded to 0.27 and -0.22 e<sup>-</sup>/Å<sup>3</sup>, respectively.

Neutral atom scattering factors were taken from Cromer and Waber<sup>6</sup>. Anomalous dispersion effects were included in  $F_{calc}$ <sup>7</sup>; the values for  $\Delta f'$  and  $\Delta f''$  were those of Creagh and McAuley<sup>8</sup>. The values for the mass attenuation coefficients are those of Creagh and Hubbell<sup>9</sup>. All calculations were performed using the CrystalStructure<sup>10,11</sup> crystallographic software package except for refinement, which was performed using SHELXL-97<sup>12</sup>.

#### References

- (1) Larson, A.C. (1970), *Crystallographic Computing*, 291-294. F.R. Ahmed, ed. Munksgaard, Copenhagen (equation 22, with V replaced by the cell volume).
- (2) SIR92: Altomare, A., Cascarano, G., Giacovazzo, C., Guagliardi, A., Burla, M., Polidori, G., and Camalli, M. (1994) *J. Appl. Cryst.*, 27, 435.
- (3) DIRDIF99: Beurskens, P.T., Admiraal, G., Beurskens, G., Bosman, W.P., de Gelder, R., Israel, R. and Smits, J.M.M.(1999). The DIRDIF-99 program system, Technical Report of the Crystallography Laboratory, University of Nijmegen, The Netherlands.
- (4) Least Squares function minimized: (SHELXL97)  
$$\Sigma w(F_o^2 - F_c^2)^2$$
 where  $w$  = Least Squares weights.
- (5) Standard deviation of an observation of unit weight:  
$$[\Sigma w(F_o^2 - F_c^2)^2 / (N_o - N_v)]^{1/2}$$
where  $N_o$  = number of observations  
 $N_v$  = number of variables
- (6) Cromer, D. T. & Waber, J. T.; "International Tables for X-ray Crystallography", Vol. IV, The Kynoch Press, Birmingham, England, Table 2.2 A (1974).
- (7) Ibers, J. A. & Hamilton, W. C.; *Acta Crystallogr.*, 17, 781 (1964).

- (8) Creagh, D. C. & McAuley, W.J. ; "International Tables for Crystallography", Vol C, (A.J.C. Wilson, ed.), Kluwer Academic Publishers, Boston, Table 4.2.6.8, pages 219-222 (1992).
- (9) Creagh, D. C. & Hubbell, J.H.; "International Tables for Crystallography", Vol C, (A.J.C. Wilson, ed.), Kluwer Academic Publishers, Boston, Table 4.2.4.3, pages 200-206 (1992).
- (10) CrystalStructure 3.7.0: Crystal Structure Analysis Package, Rigaku and Rigaku/MSK (2000-2005). 9009 New Trails Dr. The Woodlands TX 77381 USA.
- (11) CRYSTALS Issue 10: Watkin, D.J., Prout, C.K. Carruthers, J.R. & Betteridge, P.W. Chemical Crystallography Laboratory, Oxford, UK. (1996)
- (12) SHELX97: Sheldrick, G.M. (1997).

Experimental procedures for X-ray crystallography (1).

#### Data Collection

An yellow prism crystal of  $C_{51}H_{63}N_{12}B_3F_{12}Pd_3O_6$  having approximate dimensions of 0.10 x 0.10 x 0.10 mm was mounted on a glass fiber. All measurements were made on a Rigaku RAXIS IV imaging plate area detector with graphite monochromated Mo-K $\alpha$  radiation.

Indexing was performed from 3 oscillations that were exposed for 360 seconds. The crystal-to-detector distance was 110.00 mm.

Cell constants and an orientation matrix for data collection corresponded to a primitive triclinic cell with dimensions:

$$\begin{array}{ll} a = 13.074(8) \text{ \AA} & \alpha = 105.76(4)^\circ \\ b = 15.005(9) \text{ \AA} & \beta = 97.23(4)^\circ \\ c = 17.337(9) \text{ \AA} & \gamma = 110.73(2)^\circ \\ V = 2966.6(29) \text{ \AA}^3 & \end{array}$$

For  $Z = 2$  and  $F.W. = 1519.76$ , the calculated density is  $1.701 \text{ g/cm}^3$ . Based on a statistical analysis of intensity distribution, and the successful solution and refinement of the structure, the space group was determined to be:

P-1 (#2)

The data were collected at a temperature of  $-60 \pm 1^\circ\text{C}$  to a maximum  $2\theta$  value of  $54.8^\circ$ . A total of 36 oscillation images were collected. A sweep of data was done using  $\omega$  oscillations from  $0.0$  to  $180.0^\circ$  in  $5.0^\circ$  steps. The exposure rate was  $799.8 \text{ [sec./}^\circ\text{]}$ . The crystal-to-detector distance was

110.00 mm. Readout was performed in the 0.100 mm pixel mode.

#### Data Reduction

Of the 15780 reflections that were collected, 10416 were unique ( $R_{\text{int}} = 0.076$ ).

The linear absorption coefficient,  $\mu$ , for Mo-K $\alpha$  radiation is 9.966 cm<sup>-1</sup>. The data were corrected for Lorentz and polarization effects.

#### Structure Solution and Refinement

The structure was solved by direct methods<sup>1</sup> and expanded using Fourier techniques<sup>2</sup>. The non-hydrogen atoms were refined anisotropically. Hydrogen atoms were refined isotropically. The final cycle of full-matrix least-squares refinement<sup>3</sup> on  $F^2$  was based on 10416 observed reflections and 689 variable parameters and converged (largest parameter shift was 0.00 times its esd) with unweighted and weighted agreement factors of:

$$R1 = \Sigma ||F_o| - |F_c|| / \Sigma |F_o| = 0.0752$$
$$wR2 = [ \Sigma ( w (F_o^2 - F_c^2)^2 ) / \Sigma w(F_o^2)^2 ]^{1/2} = 0.2264$$

The standard deviation of an observation of unit weight<sup>4</sup> was 0.904. Unit weights were used. The maximum and minimum peaks on the final difference Fourier map corresponded to 0.663 and -0.762 e<sup>-</sup>/Å<sup>3</sup>, respectively.

Neutral atom scattering factors were taken from Cromer and Waber<sup>5</sup>. Anomalous dispersion effects were included in  $F_{\text{calc}}$ <sup>6</sup>; the values for  $\Delta f'$  and  $\Delta f''$  were those of Creagh and McAuley<sup>7</sup>. The values for the mass attenuation coefficients are those of Creagh and Hubbell<sup>8</sup>. All calculations were performed using the CrystalStructure<sup>9,10</sup> crystallographic software package except for refinement, which was performed using SHELXL-97<sup>11</sup>.

#### *References*

- (1) SHELX97: Sheldrick, G.M. (1997).
- (2) DIRDIF99: Beurskens, P.T., Admiraal, G., Beurskens, G., Bosman, W.P., de Gelder, R., Israel, R. and Smits, J.M.M.(1999). The DIRDIF-99 program system, Technical Report of the Crystallography Laboratory, University of Nijmegen, The Netherlands.
- (3) Least Squares function minimized: (SHELXL97)

$$\Sigma w(F_o^2 - F_c^2)^2 \quad \text{where } w = \text{Least Squares weights.}$$

- (4) Standard deviation of an observation of unit weight:

$$[\Sigma w(F_o^2 - F_c^2)^2 / (N_o - N_v)]^{1/2}$$

where  $N_o$  = number of observations

$N_v$  = number of variables

- (5) Cromer, D. T. & Waber, J. T.; "International Tables for X-ray Crystallography", Vol. IV, The Kynoch Press, Birmingham, England, Table 2.2 A (1974).
- (6) Ibers, J. A. & Hamilton, W. C.; Acta Crystallogr., 17, 781 (1964).
- (7) Creagh, D. C. & McAuley, W.J. ; "International Tables for Crystallography", Vol C, (A.J.C. Wilson, ed.), Kluwer Academic Publishers, Boston, Table 4.2.6.8, pages 219-222 (1992).
- (8) Creagh, D. C. & Hubbell, J.H.; "International Tables for Crystallography", Vol C, (A.J.C. Wilson, ed.), Kluwer Academic Publishers, Boston, Table 4.2.4.3, pages 200-206 (1992).
- (9) CrystalStructure 3.7.0: Crystal Structure Analysis Package, Rigaku and Rigaku/MSO (2000-2005). 9009 New Trails Dr. The Woodlands TX 77381 USA.
- (10) CRYSTALS Issue 10: Watkin, D.J., Prout, C.K. Carruthers, J.R. & Betteridge, P.W. Chemical Crystallography Laboratory, Oxford, UK. (1996)
- (11) SHELX97: Sheldrick, G.M. (1997).

Experimental procedures for X-ray crystallography (2).

### Data Collection

An orange prismatic crystal of  $C_{65.5}H_{82.5}N_{11.5}B_3F_{12}Rh_3O_5$  having approximate dimensions of 0.10 x 0.10 x 0.10 mm was mounted on a glass fiber. All measurements were made on a Rigaku RAXIS IV imaging plate area detector with graphite monochromated Mo- $K\alpha$  radiation.

Indexing was performed from 3 oscillations that were exposed for 180 seconds. The crystal-to-detector distance was 110.00 mm.

Cell constants and an orientation matrix for data collection corresponded to a primitive triclinic cell with dimensions:

$$\begin{array}{ll} a = 14.304(3) \text{ \AA} & \alpha = 104.890(11)^\circ \\ b = 14.663(5) \text{ \AA} & \beta = 90.88(2)^\circ \\ c = 18.456(6) \text{ \AA} & \gamma = 108.688(16)^\circ \\ V = 3523.5(19) \text{ \AA}^3 & \end{array}$$

For  $Z = 2$  and  $F.W. = 1680.09$ , the calculated density is  $1.584 \text{ g/cm}^3$ . Based on a statistical analysis of intensity distribution, and the successful solution and refinement of the structure, the space group was determined to be:

### P-1 (#2)

The data were collected at a temperature of  $-60 \pm 1^\circ\text{C}$  to a maximum  $2\theta$  value of  $55.0^\circ$ . A total of 36 oscillation images were collected. A sweep of data was done using  $\omega$  oscillations from  $0.0$  to  $180.0^\circ$  in  $5.0^\circ$  steps. The exposure rate was  $880.2$  [sec./ $^\circ$ ]. The crystal-to-detector distance was  $110.00$  mm. Readout was performed in the  $0.100$  mm pixel mode.

#### Data Reduction

Of the 25478 reflections that were collected, 14223 were unique ( $R_{\text{int}} = 0.088$ ).

The linear absorption coefficient,  $\mu$ , for Mo-K $\alpha$  radiation is  $7.83$   $\text{cm}^{-1}$ . The data were corrected for Lorentz and polarization effects.

#### Structure Solution and Refinement

The structure was solved by direct methods<sup>1</sup> and expanded using Fourier techniques<sup>2</sup>. The non-hydrogen atoms were refined anisotropically. Hydrogen atoms were refined isotropically. The final cycle of full-matrix least-squares refinement<sup>3</sup> on  $F^2$  was based on 14223 observed reflections and 895 variable parameters and converged (largest parameter shift was 0.014 times its esd) with unweighted and weighted agreement factors of:

$$R1 = \Sigma ||F_o| - |F_c|| / \Sigma |F_o| = 0.0892$$
$$wR2 = [ \Sigma ( w (F_o^2 - F_c^2)^2 ) / \Sigma w(F_o^2)^2 ]^{1/2} = 0.2726$$

The standard deviation of an observation of unit weight<sup>4</sup> was 1.06. Unit weights were used. The maximum and minimum peaks on the final difference Fourier map corresponded to 1.61 and  $-2.17$   $\text{e}^{-/\text{\AA}^3}$ , respectively.

Neutral atom scattering factors were taken from Cromer and Waber<sup>5</sup>. Anomalous dispersion effects were included in  $F_{\text{calc}}$ <sup>6</sup>; the values for  $\Delta f'$  and  $\Delta f''$  were those of Creagh and McAuley<sup>7</sup>. The values for the mass attenuation coefficients are those of Creagh and Hubbell<sup>8</sup>. All calculations were performed using the CrystalStructure<sup>9,10</sup> crystallographic software package except for refinement, which was performed using SHELXL-97<sup>11</sup>.

#### *References*

- (1) SHELX97: Sheldrick, G.M. (1997).
- (2) DIRDIF99: Beurskens, P.T., Admiraal, G., Beurskens, G., Bosman, W.P., de Gelder, R., Israel, R. and Smits, J.M.M.(1999). The DIRDIF-99 program system, Technical Report of the Crystallography Laboratory, University of Nijmegen, The Netherlands.
- (3) Least Squares function minimized: (SHELXL97)

$$\sum w(F_o^2 - F_c^2)^2 \quad \text{where } w = \text{Least Squares weights.}$$

(4) Standard deviation of an observation of unit weight:

$$[\sum w(F_o^2 - F_c^2)^2 / (N_o - N_v)]^{1/2}$$

where  $N_o$  = number of observations

$N_v$  = number of variables

(5) Cromer, D. T. & Waber, J. T.; "International Tables for X-ray Crystallography", Vol. IV, The Kynoch Press, Birmingham, England, Table 2.2 A (1974).

(6) Ibers, J. A. & Hamilton, W. C.; Acta Crystallogr., 17, 781 (1964).

(7) Creagh, D. C. & McAuley, W.J. ; "International Tables for Crystallography", Vol C, (A.J.C. Wilson, ed.), Kluwer Academic Publishers, Boston, Table 4.2.6.8, pages 219-222 (1992).

(8) Creagh, D. C. & Hubbell, J.H.; "International Tables for Crystallography", Vol C, (A.J.C. Wilson, ed.), Kluwer Academic Publishers, Boston, Table 4.2.4.3, pages 200-206 (1992).

(9) CrystalStructure 3.7.0: Crystal Structure Analysis Package, Rigaku and Rigaku/MSK (2000-2005). 9009 New Trails Dr. The Woodlands TX 77381 USA.

(10) CRYSTALS Issue 10: Watkin, D.J., Prout, C.K. Carruthers, J.R. & Betteridge, P.W. Chemical Crystallography Laboratory, Oxford, UK. (1996)

(11) SHELX97: Sheldrick, G.M. (1997).



**Table S1.** Crystallographic Data for  $L^{pypz3}$ , **1**, and **2**.

|                                              | $L^{pypz3}$                                    | $L^{pypz3}$ -Pd(allyl) ( <b>1</b> )                                                                           | $L^{pypz3}$ -Rh(cod) ( <b>2</b> )                                                                                                                       |
|----------------------------------------------|------------------------------------------------|---------------------------------------------------------------------------------------------------------------|---------------------------------------------------------------------------------------------------------------------------------------------------------|
| formula                                      | C <sub>39</sub> H <sub>39</sub> N <sub>9</sub> | C <sub>51</sub> H <sub>63</sub> B <sub>3</sub> F <sub>12</sub> N <sub>12</sub> O <sub>6</sub> Pd <sub>3</sub> | C <sub>65</sub> H <sub>81</sub> B <sub>3</sub> F <sub>12</sub> N <sub>11</sub> O <sub>4</sub> Rh <sub>3</sub><br>+0.5(CH <sub>3</sub> NO <sub>2</sub> ) |
| formula weight                               | 633.80                                         | 1519.76                                                                                                       | 1680.09                                                                                                                                                 |
| crystal system                               | monoclinic                                     | triclinic                                                                                                     | triclinic                                                                                                                                               |
| space group                                  | <i>P21/n</i> (#14)                             | <i>P</i> -1(#2)                                                                                               | <i>P</i> -1(#2)                                                                                                                                         |
| <i>a</i> /Å                                  | 11.3126(6)                                     | 13.074(8)                                                                                                     | 14.304(3)                                                                                                                                               |
| <i>b</i> /Å                                  | 26.386(2)                                      | 15.005(9)                                                                                                     | 14.663(5)                                                                                                                                               |
| <i>c</i> /Å                                  | 12.211(1)                                      | 17.337(9)                                                                                                     | 18.456(6)                                                                                                                                               |
| $\alpha$ /deg                                | 90                                             | 105.76(4)                                                                                                     | 104.890(11)                                                                                                                                             |
| $\beta$ /deg                                 | 109.579(4)                                     | 97.23(4)                                                                                                      | 90.88(2)                                                                                                                                                |
| $\gamma$ /deg                                | 90                                             | 110.73(2)                                                                                                     | 108.688(16)                                                                                                                                             |
| <i>V</i> /Å <sup>3</sup>                     | 3434.1(5)                                      | 2967(3)                                                                                                       | 3523.5(19)                                                                                                                                              |
| <i>Z</i>                                     | 4                                              | 2                                                                                                             | 2                                                                                                                                                       |
| <i>d</i> <sub>calc</sub> /g·cm <sup>-3</sup> | 1.226                                          | 1.701                                                                                                         | 1.584                                                                                                                                                   |
| temp                                         | -60                                            | -60                                                                                                           | -60                                                                                                                                                     |
| radiation                                    | MoK $\alpha$<br>( $\lambda$ = 0.71069 Å)       | MoK $\alpha$<br>( $\lambda$ = 0.71069 Å)                                                                      | MoK $\alpha$<br>( $\lambda$ = 0.71069 Å)                                                                                                                |
| $\mu$ /cm <sup>-1</sup>                      | 7.60                                           | 9.96                                                                                                          | 7.83                                                                                                                                                    |
| diffractometer                               | Rigaku RAXIS IV                                | Rigaku RAXIS IV                                                                                               | Rigaku RAXIS IV                                                                                                                                         |
| max 2 $\theta$ /deg                          | 55.0                                           | 55.0                                                                                                          | 55.0                                                                                                                                                    |
| reflections collected                        | 27257                                          | 15780                                                                                                         | 25478                                                                                                                                                   |
| independent                                  | 7173                                           | 10416                                                                                                         | 14223                                                                                                                                                   |
| reflections                                  | [R(int) = 0.061]                               | [R(int) = 0.0757]                                                                                             | [R(int) = 0.0880]                                                                                                                                       |
| no. of parameters                            | 591                                            | 694                                                                                                           | 895                                                                                                                                                     |
| refined                                      |                                                |                                                                                                               |                                                                                                                                                         |
| R1 ( <i>I</i> > 2 $\sigma$ ) %               | 4.57                                           | 7.52                                                                                                          | 8.92                                                                                                                                                    |
| wR <sub>2</sub> (All) %                      | 12.2                                           | 22.64                                                                                                         | 27.26                                                                                                                                                   |
| goodness of fit                              | 1.031                                          | 0.904                                                                                                         | 1.060                                                                                                                                                   |

| Table S2. Bond lengths [Å] for $L^{pypz3}$ . |            |             |            |
|----------------------------------------------|------------|-------------|------------|
|                                              |            | C(24)-C(25) | 1.364(2)   |
|                                              |            | C(25)-C(26) | 1.400(2)   |
|                                              |            | C(26)-C(27) | 1.4685(18) |
| N(1)-N(2)                                    | 1.3482(13) | C(27)-C(28) | 1.393(2)   |
| N(1)-C(16)                                   | 1.3497(16) | C(28)-C(29) | 1.380(2)   |
| N(1)-C(13)                                   | 1.4711(15) | C(29)-C(30) | 1.383(2)   |
| N(2)-C(18)                                   | 1.3357(16) | C(30)-C(31) | 1.377(2)   |
| N(3)-C(19)                                   | 1.3365(17) | C(32)-C(33) | 1.351(3)   |
| N(3)-C(23)                                   | 1.3399(18) | C(33)-C(34) | 1.402(2)   |
| N(4)-N(5)                                    | 1.3488(14) | C(34)-C(35) | 1.462(3)   |
| N(4)-C(24)                                   | 1.3502(18) | C(35)-C(36) | 1.394(3)   |
| N(4)-C(14)                                   | 1.4641(16) | C(36)-C(37) | 1.372(3)   |
| N(5)-C(26)                                   | 1.3417(16) | C(37)-C(38) | 1.411(4)   |
| N(6)-C(27)                                   | 1.3431(17) | C(38)-C(39) | 1.364(4)   |
| N(6)-C(31)                                   | 1.3436(17) |             |            |
| N(7)-N(8)                                    | 1.3504(18) |             |            |
| N(7)-C(32)                                   | 1.3523(18) |             |            |
| N(7)-C(15)                                   | 1.459(2)   |             |            |
| N(8)-C(34)                                   | 1.3419(19) |             |            |
| N(9)-C(39)                                   | 1.311(3)   |             |            |
| N(9)-C(35)                                   | 1.340(2)   |             |            |
| C(1)-C(2)                                    | 1.4039(17) |             |            |
| C(1)-C(6)                                    | 1.4058(17) |             |            |
| C(1)-C(7)                                    | 1.5132(19) |             |            |
| C(2)-C(3)                                    | 1.4016(17) |             |            |
| C(2)-C(13)                                   | 1.5143(16) |             |            |
| C(3)-C(4)                                    | 1.4086(16) |             |            |
| C(3)-C(9)                                    | 1.5174(17) |             |            |
| C(4)-C(5)                                    | 1.4037(17) |             |            |
| C(4)-C(14)                                   | 1.5158(18) |             |            |
| C(5)-C(6)                                    | 1.3970(18) |             |            |
| C(5)-C(11)                                   | 1.5201(17) |             |            |
| C(6)-C(15)                                   | 1.5140(18) |             |            |
| C(7)-C(8)                                    | 1.527(2)   |             |            |
| C(9)-C(10)                                   | 1.523(2)   |             |            |
| C(11)-C(12)                                  | 1.533(2)   |             |            |
| C(16)-C(17)                                  | 1.3689(18) |             |            |
| C(17)-C(18)                                  | 1.4040(18) |             |            |
| C(18)-C(19)                                  | 1.4741(16) |             |            |
| C(19)-C(20)                                  | 1.389(2)   |             |            |
| C(20)-C(21)                                  | 1.3799(19) |             |            |
| C(21)-C(22)                                  | 1.371(2)   |             |            |
| C(22)-C(23)                                  | 1.379(2)   |             |            |

Table S3. Bond angles [deg] for **L**<sup>pypz3</sup>.

|                   |            |                   |            |
|-------------------|------------|-------------------|------------|
| N(2)-N(1)-C(16)   | 111.91(10) | N(2)-C(18)-C(19)  | 120.66(11) |
| N(2)-N(1)-C(13)   | 119.42(10) | C(17)-C(18)-C(19) | 128.04(12) |
| C(16)-N(1)-C(13)  | 128.67(10) | N(3)-C(19)-C(20)  | 122.25(12) |
| C(18)-N(2)-N(1)   | 104.82(10) | N(3)-C(19)-C(18)  | 116.35(12) |
| C(19)-N(3)-C(23)  | 117.35(13) | C(20)-C(19)-C(18) | 121.39(12) |
| N(5)-N(4)-C(24)   | 112.03(11) | C(21)-C(20)-C(19) | 119.02(15) |
| N(5)-N(4)-C(14)   | 120.16(10) | C(22)-C(21)-C(20) | 119.40(15) |
| C(24)-N(4)-C(14)  | 127.82(11) | C(21)-C(22)-C(23) | 117.89(13) |
| C(26)-N(5)-N(4)   | 104.70(10) | N(3)-C(23)-C(22)  | 124.09(15) |
| C(27)-N(6)-C(31)  | 117.31(13) | N(4)-C(24)-C(25)  | 107.12(13) |
| N(8)-N(7)-C(32)   | 112.63(15) | C(24)-C(25)-C(26) | 105.22(13) |
| N(8)-N(7)-C(15)   | 121.28(11) | N(5)-C(26)-C(25)  | 110.93(12) |
| C(32)-N(7)-C(15)  | 126.03(14) | N(5)-C(26)-C(27)  | 120.77(12) |
| C(34)-N(8)-N(7)   | 104.26(13) | C(25)-C(26)-C(27) | 128.30(13) |
| C(39)-N(9)-C(35)  | 117.7(2)   | N(6)-C(27)-C(28)  | 122.81(12) |
| C(2)-C(1)-C(6)    | 119.16(11) | N(6)-C(27)-C(26)  | 115.50(12) |
| C(2)-C(1)-C(7)    | 120.75(11) | C(28)-C(27)-C(26) | 121.69(12) |
| C(6)-C(1)-C(7)    | 120.06(11) | C(29)-C(28)-C(27) | 118.63(14) |
| C(3)-C(2)-C(1)    | 120.79(10) | C(28)-C(29)-C(30) | 119.12(15) |
| C(3)-C(2)-C(13)   | 120.08(11) | C(31)-C(30)-C(29) | 118.61(14) |
| C(1)-C(2)-C(13)   | 119.06(11) | N(6)-C(31)-C(30)  | 123.52(14) |
| C(2)-C(3)-C(4)    | 119.08(11) | C(33)-C(32)-N(7)  | 106.42(16) |
| C(2)-C(3)-C(9)    | 120.98(11) | C(32)-C(33)-C(34) | 106.20(15) |
| C(4)-C(3)-C(9)    | 119.84(11) | N(8)-C(34)-C(33)  | 110.49(17) |
| C(5)-C(4)-C(3)    | 120.74(11) | N(8)-C(34)-C(35)  | 121.16(15) |
| C(5)-C(4)-C(14)   | 119.56(11) | C(33)-C(34)-C(35) | 128.34(16) |
| C(3)-C(4)-C(14)   | 119.68(11) | N(9)-C(35)-C(36)  | 122.03(19) |
| C(6)-C(5)-C(4)    | 119.26(11) | N(9)-C(35)-C(34)  | 115.46(17) |
| C(6)-C(5)-C(11)   | 119.47(12) | C(36)-C(35)-C(34) | 122.50(16) |
| C(4)-C(5)-C(11)   | 121.27(12) | C(37)-C(36)-C(35) | 119.8(2)   |
| C(5)-C(6)-C(1)    | 120.91(11) | C(36)-C(37)-C(38) | 117.4(3)   |
| C(5)-C(6)-C(15)   | 119.70(11) | C(39)-C(38)-C(37) | 118.3(3)   |
| C(1)-C(6)-C(15)   | 119.37(12) | N(9)-C(39)-C(38)  | 124.8(3)   |
| C(1)-C(7)-C(8)    | 111.36(14) |                   |            |
| C(3)-C(9)-C(10)   | 112.11(12) |                   |            |
| C(5)-C(11)-C(12)  | 113.06(13) |                   |            |
| N(1)-C(13)-C(2)   | 110.93(10) |                   |            |
| N(4)-C(14)-C(4)   | 110.45(11) |                   |            |
| N(7)-C(15)-C(6)   | 112.32(11) |                   |            |
| N(1)-C(16)-C(17)  | 107.37(11) |                   |            |
| C(16)-C(17)-C(18) | 104.60(12) |                   |            |
| N(2)-C(18)-C(17)  | 111.30(10) |                   |            |

Symmetry transformations used to generate equivalent atoms:

| Table S4. Bond lengths [ $\text{\AA}$ ] for <b>1</b> . |           |              |           |
|--------------------------------------------------------|-----------|--------------|-----------|
|                                                        |           | C(3)-C(9)    | 1.521(11) |
|                                                        |           | C(4)-C(5)    | 1.390(12) |
|                                                        |           | C(4)-C(14)   | 1.523(12) |
|                                                        |           | C(5)-C(6)    | 1.405(13) |
|                                                        |           | C(5)-C(11)   | 1.509(13) |
|                                                        |           | C(6)-C(15)   | 1.520(11) |
|                                                        |           | C(7)-C(8)    | 1.523(12) |
|                                                        |           | C(9)-C(10)   | 1.549(14) |
|                                                        |           | C(11)-C(12)  | 1.527(13) |
|                                                        |           | C(16)-C(17)  | 1.365(12) |
|                                                        |           | C(17)-C(18)  | 1.391(12) |
|                                                        |           | C(18)-C(19)  | 1.467(12) |
|                                                        |           | C(19)-C(20)  | 1.350(13) |
|                                                        |           | C(20)-C(21)  | 1.374(14) |
|                                                        |           | C(21)-C(22)  | 1.362(15) |
|                                                        |           | C(22)-C(23)  | 1.365(16) |
|                                                        |           | C(24)-C(25)  | 1.367(13) |
|                                                        |           | C(25)-C(26)  | 1.391(13) |
|                                                        |           | C(26)-C(27)  | 1.414(13) |
|                                                        |           | C(27)-C(28)  | 1.404(12) |
|                                                        |           | C(28)-C(29)  | 1.404(15) |
|                                                        |           | C(29)-C(30)  | 1.351(16) |
|                                                        |           | C(30)-C(31)  | 1.436(15) |
|                                                        |           | C(32)-C(33)  | 1.359(13) |
|                                                        |           | C(33)-C(34)  | 1.403(13) |
|                                                        |           | C(34)-C(35)  | 1.500(13) |
|                                                        |           | C(35)-C(36)  | 1.377(15) |
|                                                        |           | C(36)-C(37)  | 1.363(16) |
|                                                        |           | C(37)-C(38)  | 1.38(2)   |
|                                                        |           | C(38)-C(39)  | 1.378(19) |
|                                                        |           | C(40)-C(41A) | 1.28(3)   |
|                                                        |           | C(40)-C(41)  | 1.42(2)   |
|                                                        |           | C(41)-C(42)  | 1.33(2)   |
|                                                        |           | C(41A)-C(42) | 1.45(3)   |
|                                                        |           | C(43)-C(44A) | 1.24(3)   |
|                                                        |           | C(43)-C(44)  | 1.46(3)   |
|                                                        |           | C(44)-C(45)  | 1.30(3)   |
|                                                        |           | C(44A)-C(45) | 1.44(3)   |
|                                                        |           | C(46)-C(47)  | 1.33(3)   |
|                                                        |           | C(46)-C(47A) | 1.41(3)   |
|                                                        |           | C(47)-C(48)  | 1.26(3)   |
|                                                        |           | C(47A)-C(48) | 1.33(3)   |
|                                                        |           | B(1)-F(24)   | 1.29(3)   |
|                                                        |           | B(1)-F(1)    | 1.352(12) |
| Pd(1)-N(2)                                             | 2.105(7)  |              |           |
| Pd(1)-N(3)                                             | 2.117(9)  |              |           |
| Pd(1)-C(40)                                            | 2.134(11) |              |           |
| Pd(1)-C(41)                                            | 2.134(19) |              |           |
| Pd(1)-C(42)                                            | 2.149(11) |              |           |
| Pd(1)-C(41A)                                           | 2.20(3)   |              |           |
| Pd(2)-N(5)                                             | 2.078(7)  |              |           |
| Pd(2)-C(43)                                            | 2.119(13) |              |           |
| Pd(2)-N(6)                                             | 2.120(7)  |              |           |
| Pd(2)-C(44A)                                           | 2.13(3)   |              |           |
| Pd(2)-C(45)                                            | 2.135(9)  |              |           |
| Pd(2)-C(44)                                            | 2.19(2)   |              |           |
| Pd(3)-C(47)                                            | 2.10(3)   |              |           |
| Pd(3)-C(48)                                            | 2.107(11) |              |           |
| Pd(3)-C(47A)                                           | 2.12(2)   |              |           |
| Pd(3)-N(8)                                             | 2.128(7)  |              |           |
| Pd(3)-N(9)                                             | 2.140(9)  |              |           |
| Pd(3)-C(46)                                            | 2.152(13) |              |           |
| N(1)-C(16)                                             | 1.345(11) |              |           |
| N(1)-N(2)                                              | 1.396(9)  |              |           |
| N(1)-C(13)                                             | 1.474(11) |              |           |
| N(2)-C(18)                                             | 1.361(11) |              |           |
| N(3)-C(23)                                             | 1.361(12) |              |           |
| N(3)-C(19)                                             | 1.369(12) |              |           |
| N(4)-C(24)                                             | 1.353(12) |              |           |
| N(4)-N(5)                                              | 1.361(10) |              |           |
| N(4)-C(14)                                             | 1.467(10) |              |           |
| N(5)-C(26)                                             | 1.378(10) |              |           |
| N(6)-C(31)                                             | 1.327(12) |              |           |
| N(6)-C(27)                                             | 1.392(12) |              |           |
| N(7)-N(8)                                              | 1.329(9)  |              |           |
| N(7)-C(32)                                             | 1.346(11) |              |           |
| N(7)-C(15)                                             | 1.481(10) |              |           |
| N(8)-C(34)                                             | 1.340(12) |              |           |
| N(9)-C(35)                                             | 1.324(13) |              |           |
| N(9)-C(39)                                             | 1.326(13) |              |           |
| C(1)-C(2)                                              | 1.403(11) |              |           |
| C(1)-C(6)                                              | 1.426(12) |              |           |
| C(1)-C(7)                                              | 1.503(12) |              |           |
| C(2)-C(3)                                              | 1.430(13) |              |           |
| C(2)-C(13)                                             | 1.496(12) |              |           |
| C(3)-C(4)                                              | 1.410(12) |              |           |

|               |           |
|---------------|-----------|
| B(1)-F(3)     | 1.363(19) |
| B(1)-F(22)    | 1.36(2)   |
| B(1)-F(23)    | 1.436(18) |
| B(1)-F(2)     | 1.43(3)   |
| B(1)-F(4)     | 1.50(3)   |
| B(2)-F(37)    | 1.30(2)   |
| B(2)-F(36)    | 1.36(2)   |
| B(2)-F(38)    | 1.37(2)   |
| B(2)-F(6)     | 1.39(2)   |
| B(2)-F(7)     | 1.40(2)   |
| B(2)-F(5)     | 1.415(16) |
| B(2)-F(8)     | 1.46(3)   |
| B(3)-F(10)    | 1.321(19) |
| B(3)-F(40)    | 1.36(2)   |
| B(3)-F(41)    | 1.38(4)   |
| B(3)-F(9)     | 1.380(16) |
| B(3)-F(11)    | 1.39(2)   |
| B(3)-F(12)    | 1.40(2)   |
| B(3)-F(42)    | 1.43(3)   |
| C(49)-N(10)   | 1.55(2)   |
| N(10)-O(1)    | 1.180(14) |
| N(10)-O(2)    | 1.189(15) |
| C(50)-N(11)   | 1.50(3)   |
| N(11)-O(4)    | 1.23(2)   |
| N(11)-O(3)    | 1.35(2)   |
| C(51)-C(51)#1 | 1.42(5)   |
| C(51)-N(12)   | 1.58(3)   |
| N(12)-O(6)    | 1.19(3)   |
| N(12)-O(5)    | 1.26(3)   |

Table S5. Bond angles [deg] for **1**.

|                    |           |                    |           |
|--------------------|-----------|--------------------|-----------|
| N(2)-Pd(1)-N(3)    | 78.4(3)   | C(47A)-Pd(3)-C(46) | 38.4(7)   |
| N(2)-Pd(1)-C(40)   | 177.7(5)  | N(8)-Pd(3)-C(46)   | 109.4(4)  |
| N(3)-Pd(1)-C(40)   | 102.0(4)  | N(9)-Pd(3)-C(46)   | 171.9(4)  |
| N(2)-Pd(1)-C(41)   | 139.9(6)  | C(16)-N(1)-N(2)    | 109.6(7)  |
| N(3)-Pd(1)-C(41)   | 135.3(5)  | C(16)-N(1)-C(13)   | 129.4(7)  |
| C(40)-Pd(1)-C(41)  | 38.7(6)   | N(2)-N(1)-C(13)    | 120.2(6)  |
| N(2)-Pd(1)-C(42)   | 110.9(3)  | C(18)-N(2)-N(1)    | 103.7(7)  |
| N(3)-Pd(1)-C(42)   | 170.7(3)  | C(18)-N(2)-Pd(1)   | 113.1(5)  |
| C(40)-Pd(1)-C(42)  | 68.7(4)   | N(1)-N(2)-Pd(1)    | 140.1(6)  |
| C(41)-Pd(1)-C(42)  | 36.2(6)   | C(23)-N(3)-C(19)   | 117.8(9)  |
| N(2)-Pd(1)-C(41A)  | 146.2(7)  | C(23)-N(3)-Pd(1)   | 126.9(7)  |
| N(3)-Pd(1)-C(41A)  | 132.5(8)  | C(19)-N(3)-Pd(1)   | 115.3(6)  |
| C(40)-Pd(1)-C(41A) | 34.2(7)   | C(24)-N(4)-N(5)    | 111.3(7)  |
| C(41)-Pd(1)-C(41A) | 29.5(8)   | C(24)-N(4)-C(14)   | 131.0(8)  |
| C(42)-Pd(1)-C(41A) | 38.8(8)   | N(5)-N(4)-C(14)    | 117.7(7)  |
| N(5)-Pd(2)-C(43)   | 178.3(5)  | N(4)-N(5)-C(26)    | 105.2(7)  |
| N(5)-Pd(2)-N(6)    | 77.2(3)   | N(4)-N(5)-Pd(2)    | 138.3(5)  |
| C(43)-Pd(2)-N(6)   | 104.1(4)  | C(26)-N(5)-Pd(2)   | 116.6(6)  |
| N(5)-Pd(2)-C(44A)  | 145.2(7)  | C(31)-N(6)-C(27)   | 120.7(8)  |
| C(43)-Pd(2)-C(44A) | 33.9(8)   | C(31)-N(6)-Pd(2)   | 125.7(7)  |
| N(6)-Pd(2)-C(44A)  | 134.6(7)  | C(27)-N(6)-Pd(2)   | 113.6(5)  |
| N(5)-Pd(2)-C(45)   | 109.5(4)  | N(8)-N(7)-C(32)    | 110.3(7)  |
| C(43)-Pd(2)-C(45)  | 69.1(5)   | N(8)-N(7)-C(15)    | 119.3(6)  |
| N(6)-Pd(2)-C(45)   | 173.2(4)  | C(32)-N(7)-C(15)   | 129.6(7)  |
| C(44A)-Pd(2)-C(45) | 39.4(8)   | N(7)-N(8)-C(34)    | 106.6(7)  |
| N(5)-Pd(2)-C(44)   | 138.7(7)  | N(7)-N(8)-Pd(3)    | 138.1(6)  |
| C(43)-Pd(2)-C(44)  | 39.6(7)   | C(34)-N(8)-Pd(3)   | 111.6(6)  |
| N(6)-Pd(2)-C(44)   | 138.6(7)  | C(35)-N(9)-C(39)   | 117.9(10) |
| C(44A)-Pd(2)-C(44) | 28.3(8)   | C(35)-N(9)-Pd(3)   | 115.7(6)  |
| C(45)-Pd(2)-C(44)  | 34.9(6)   | C(39)-N(9)-Pd(3)   | 126.2(8)  |
| C(47)-Pd(3)-C(48)  | 35.0(9)   | C(2)-C(1)-C(6)     | 119.7(8)  |
| C(47)-Pd(3)-C(47A) | 24.9(9)   | C(2)-C(1)-C(7)     | 120.6(8)  |
| C(48)-Pd(3)-C(47A) | 36.8(7)   | C(6)-C(1)-C(7)     | 119.8(7)  |
| C(47)-Pd(3)-N(8)   | 144.3(10) | C(1)-C(2)-C(3)     | 118.9(8)  |
| C(48)-Pd(3)-N(8)   | 177.9(5)  | C(1)-C(2)-C(13)    | 122.4(8)  |
| C(47A)-Pd(3)-N(8)  | 141.3(6)  | C(3)-C(2)-C(13)    | 118.6(7)  |
| C(47)-Pd(3)-N(9)   | 137.3(10) | C(4)-C(3)-C(2)     | 120.1(7)  |
| C(48)-Pd(3)-N(9)   | 103.4(5)  | C(4)-C(3)-C(9)     | 121.4(8)  |
| C(47A)-Pd(3)-N(9)  | 133.5(6)  | C(2)-C(3)-C(9)     | 118.5(8)  |
| N(8)-Pd(3)-N(9)    | 77.7(3)   | C(5)-C(4)-C(3)     | 121.1(8)  |
| C(47)-Pd(3)-C(46)  | 36.5(9)   | C(5)-C(4)-C(14)    | 118.0(8)  |
| C(48)-Pd(3)-C(46)  | 69.4(5)   | C(3)-C(4)-C(14)    | 120.9(8)  |
|                    |           | C(4)-C(5)-C(6)     | 119.0(8)  |
|                    |           | C(4)-C(5)-C(11)    | 122.2(8)  |

|                   |           |                    |           |
|-------------------|-----------|--------------------|-----------|
| C(6)-C(5)-C(11)   | 118.8(8)  | C(37)-C(38)-C(39)  | 117.8(12) |
| C(5)-C(6)-C(1)    | 121.2(7)  | N(9)-C(39)-C(38)   | 122.8(13) |
| C(5)-C(6)-C(15)   | 120.5(8)  | C(41A)-C(40)-C(41) | 48.2(14)  |
| C(1)-C(6)-C(15)   | 118.4(7)  | C(41A)-C(40)-Pd(1) | 75.8(13)  |
| C(1)-C(7)-C(8)    | 112.1(7)  | C(41)-C(40)-Pd(1)  | 70.6(8)   |
| C(3)-C(9)-C(10)   | 111.5(7)  | C(42)-C(41)-C(40)  | 123.2(16) |
| C(5)-C(11)-C(12)  | 112.4(8)  | C(42)-C(41)-Pd(1)  | 72.5(9)   |
| N(1)-C(13)-C(2)   | 109.7(7)  | C(40)-C(41)-Pd(1)  | 70.6(9)   |
| N(4)-C(14)-C(4)   | 111.9(7)  | C(40)-C(41A)-C(42) | 125(2)    |
| N(7)-C(15)-C(6)   | 110.2(6)  | C(40)-C(41A)-Pd(1) | 70.0(13)  |
| N(1)-C(16)-C(17)  | 110.3(8)  | C(42)-C(41A)-Pd(1) | 68.7(11)  |
| C(16)-C(17)-C(18) | 103.9(8)  | C(41)-C(42)-C(41A) | 46.7(12)  |
| N(2)-C(18)-C(17)  | 112.4(8)  | C(41)-C(42)-Pd(1)  | 71.3(9)   |
| N(2)-C(18)-C(19)  | 118.2(8)  | C(41A)-C(42)-Pd(1) | 72.5(12)  |
| C(17)-C(18)-C(19) | 129.3(8)  | C(44A)-C(43)-C(44) | 45.2(14)  |
| C(20)-C(19)-N(3)  | 121.8(8)  | C(44A)-C(43)-Pd(2) | 73.5(14)  |
| C(20)-C(19)-C(18) | 124.4(8)  | C(44)-C(43)-Pd(2)  | 72.8(11)  |
| N(3)-C(19)-C(18)  | 113.7(8)  | C(45)-C(44)-C(43)  | 122(2)    |
| C(19)-C(20)-C(21) | 119.8(10) | C(45)-C(44)-Pd(2)  | 70.2(12)  |
| C(22)-C(21)-C(20) | 119.2(10) | C(43)-C(44)-Pd(2)  | 67.5(11)  |
| C(21)-C(22)-C(23) | 120.0(9)  | C(43)-C(44A)-C(45) | 129(2)    |
| N(3)-C(23)-C(22)  | 121.3(10) | C(43)-C(44A)-Pd(2) | 72.5(14)  |
| N(4)-C(24)-C(25)  | 107.5(9)  | C(45)-C(44A)-Pd(2) | 70.5(11)  |
| C(24)-C(25)-C(26) | 106.8(8)  | C(44)-C(45)-C(44A) | 45.2(14)  |
| N(5)-C(26)-C(25)  | 109.3(8)  | C(44)-C(45)-Pd(2)  | 75.0(12)  |
| N(5)-C(26)-C(27)  | 115.0(8)  | C(44A)-C(45)-Pd(2) | 70.2(11)  |
| C(25)-C(26)-C(27) | 135.4(8)  | C(47)-C(46)-C(47A) | 38.7(16)  |
| N(6)-C(27)-C(28)  | 120.2(8)  | C(47)-C(46)-Pd(3)  | 69.6(15)  |
| N(6)-C(27)-C(26)  | 116.5(7)  | C(47A)-C(46)-Pd(3) | 69.4(10)  |
| C(28)-C(27)-C(26) | 123.2(9)  | C(48)-C(47)-C(46)  | 138(3)    |
| C(29)-C(28)-C(27) | 118.8(10) | C(48)-C(47)-Pd(3)  | 72.9(16)  |
| C(30)-C(29)-C(28) | 119.7(9)  | C(46)-C(47)-Pd(3)  | 73.9(15)  |
| C(29)-C(30)-C(31) | 120.4(10) | C(48)-C(47A)-C(46) | 124(2)    |
| N(6)-C(31)-C(30)  | 119.8(11) | C(48)-C(47A)-Pd(3) | 71.2(11)  |
| N(7)-C(32)-C(33)  | 109.0(8)  | C(46)-C(47A)-Pd(3) | 72.1(11)  |
| C(32)-C(33)-C(34) | 104.1(9)  | C(47)-C(48)-C(47A) | 40.8(16)  |
| N(8)-C(34)-C(33)  | 110.1(8)  | C(47)-C(48)-Pd(3)  | 72.1(15)  |
| N(8)-C(34)-C(35)  | 119.1(8)  | C(47A)-C(48)-Pd(3) | 72.0(11)  |
| C(33)-C(34)-C(35) | 130.9(9)  | F(24)-B(1)-F(1)    | 111.6(15) |
| N(9)-C(35)-C(36)  | 123.6(10) | F(24)-B(1)-F(3)    | 88.6(15)  |
| N(9)-C(35)-C(34)  | 113.2(9)  | F(1)-B(1)-F(3)     | 115.7(12) |
| C(36)-C(35)-C(34) | 123.2(10) | F(24)-B(1)-F(22)   | 99.9(18)  |
| C(37)-C(36)-C(35) | 117.6(13) | F(1)-B(1)-F(22)    | 115.9(13) |
| C(36)-C(37)-C(38) | 120.2(13) | F(3)-B(1)-F(22)    | 119.6(14) |

|                  |           |                     |           |
|------------------|-----------|---------------------|-----------|
| F(24)-B(1)-F(23) | 117.2(15) | F(41)-B(3)-F(11)    | 34.8(17)  |
| F(1)-B(1)-F(23)  | 106.0(10) | F(9)-B(3)-F(11)     | 108.9(13) |
| F(3)-B(1)-F(23)  | 29.0(8)   | F(10)-B(3)-F(12)    | 106.7(14) |
| F(22)-B(1)-F(23) | 106.6(13) | F(40)-B(3)-F(12)    | 92.8(14)  |
| F(24)-B(1)-F(2)  | 119.2(18) | F(41)-B(3)-F(12)    | 137(2)    |
| F(1)-B(1)-F(2)   | 104.1(12) | F(9)-B(3)-F(12)     | 109.6(12) |
| F(3)-B(1)-F(2)   | 117.8(15) | F(11)-B(3)-F(12)    | 111.5(15) |
| F(22)-B(1)-F(2)  | 19.3(12)  | F(10)-B(3)-F(42)    | 121(2)    |
| F(23)-B(1)-F(2)  | 96.9(12)  | F(40)-B(3)-F(42)    | 116(2)    |
| F(24)-B(1)-F(4)  | 14.5(16)  | F(41)-B(3)-F(42)    | 116(2)    |
| F(1)-B(1)-F(4)   | 106.2(11) | F(9)-B(3)-F(42)     | 114.0(17) |
| F(3)-B(1)-F(4)   | 103.0(15) | F(11)-B(3)-F(42)    | 86.5(19)  |
| F(22)-B(1)-F(4)  | 90.9(15)  | F(12)-B(3)-F(42)    | 25.8(15)  |
| F(23)-B(1)-F(4)  | 131.3(13) | O(1)-N(10)-O(2)     | 118.3(14) |
| F(2)-B(1)-F(4)   | 109.5(15) | O(1)-N(10)-C(49)    | 118.9(13) |
| F(37)-B(2)-F(36) | 104.1(17) | O(2)-N(10)-C(49)    | 120.9(15) |
| F(37)-B(2)-F(38) | 103.9(15) | O(4)-N(11)-O(3)     | 113(2)    |
| F(36)-B(2)-F(38) | 113.9(18) | O(4)-N(11)-C(50)    | 126(2)    |
| F(37)-B(2)-F(6)  | 81.7(15)  | O(3)-N(11)-C(50)    | 121(2)    |
| F(36)-B(2)-F(6)  | 29.3(11)  | C(51)#1-C(51)-N(12) | 140(3)    |
| F(38)-B(2)-F(6)  | 139.0(18) | O(6)-N(12)-O(5)     | 129(3)    |
| F(37)-B(2)-F(7)  | 32.4(10)  | O(6)-N(12)-C(51)    | 112(3)    |
| F(36)-B(2)-F(7)  | 134.9(18) | O(5)-N(12)-C(51)    | 119(3)    |
| F(38)-B(2)-F(7)  | 94.6(16)  |                     |           |
| F(6)-B(2)-F(7)   | 108.3(15) |                     |           |
| F(37)-B(2)-F(5)  | 127.5(16) |                     |           |
| F(36)-B(2)-F(5)  | 105.2(14) |                     |           |
| F(38)-B(2)-F(5)  | 102.5(14) |                     |           |
| F(6)-B(2)-F(5)   | 105.6(13) |                     |           |
| F(7)-B(2)-F(5)   | 101.4(14) |                     |           |
| F(37)-B(2)-F(8)  | 110.8(15) |                     |           |
| F(36)-B(2)-F(8)  | 80.5(16)  |                     |           |
| F(38)-B(2)-F(8)  | 33.6(10)  |                     |           |
| F(6)-B(2)-F(8)   | 106.0(17) |                     |           |
| F(7)-B(2)-F(8)   | 118.5(16) |                     |           |
| F(5)-B(2)-F(8)   | 116.3(13) |                     |           |
| F(10)-B(3)-F(40) | 27.6(10)  |                     |           |
| F(10)-B(3)-F(41) | 73.3(18)  |                     |           |
| F(40)-B(3)-F(41) | 100(2)    |                     |           |
| F(10)-B(3)-F(9)  | 116.2(14) |                     |           |
| F(40)-B(3)-F(9)  | 100.6(15) |                     |           |
| F(41)-B(3)-F(9)  | 108.4(18) |                     |           |
| F(10)-B(3)-F(11) | 103.8(14) |                     |           |
| F(40)-B(3)-F(11) | 131.4(16) |                     |           |

Symmetry transformations used to generate equivalent atoms:

#1 -x+1 -y -z



| Table S6. Bond lengths [ $\text{\AA}$ ] for <b>2</b> . |           |             |           |
|--------------------------------------------------------|-----------|-------------|-----------|
|                                                        |           | C(3)-C(9)   | 1.535(10) |
|                                                        |           | C(4)-C(5)   | 1.413(10) |
| Rh(1)-N(3)                                             | 2.117(6)  | C(4)-C(14)  | 1.509(10) |
| Rh(1)-C(61)                                            | 2.132(8)  | C(5)-C(6)   | 1.407(10) |
| Rh(1)-N(2)                                             | 2.133(5)  | C(5)-C(11)  | 1.536(9)  |
| Rh(1)-C(56)                                            | 2.137(9)  | C(6)-C(15)  | 1.525(9)  |
| Rh(1)-C(60)                                            | 2.141(6)  | C(7)-C(8)   | 1.517(10) |
| Rh(1)-C(57)                                            | 2.149(8)  | C(9)-C(10)  | 1.552(12) |
| Rh(2)-C(54)                                            | 2.107(9)  | C(11)-C(12) | 1.517(12) |
| Rh(2)-N(5)                                             | 2.110(6)  | C(16)-C(17) | 1.378(12) |
| Rh(2)-N(6)                                             | 2.128(5)  | C(17)-C(18) | 1.388(10) |
| Rh(2)-C(55)                                            | 2.130(7)  | C(18)-C(19) | 1.431(11) |
| Rh(2)-C(50)                                            | 2.146(7)  | C(19)-C(20) | 1.387(10) |
| Rh(2)-C(51)                                            | 2.166(6)  | C(20)-C(21) | 1.375(12) |
| Rh(3)-N(8)                                             | 2.120(6)  | C(21)-C(22) | 1.346(12) |
| Rh(3)-C(45)                                            | 2.124(9)  | C(22)-C(23) | 1.387(13) |
| Rh(3)-N(9)                                             | 2.127(6)  | C(24)-C(25) | 1.336(10) |
| Rh(3)-C(44)                                            | 2.130(6)  | C(25)-C(26) | 1.372(11) |
| Rh(3)-C(40)                                            | 2.145(7)  | C(26)-C(27) | 1.477(10) |
| Rh(3)-C(41)                                            | 2.157(8)  | C(27)-C(28) | 1.364(10) |
| N(1)-C(16)                                             | 1.355(9)  | C(28)-C(29) | 1.394(11) |
| N(1)-N(2)                                              | 1.359(8)  | C(29)-C(30) | 1.373(13) |
| N(1)-C(13)                                             | 1.467(9)  | C(30)-C(31) | 1.418(10) |
| N(2)-C(18)                                             | 1.363(10) | C(32)-C(33) | 1.361(12) |
| N(3)-C(23)                                             | 1.346(10) | C(33)-C(34) | 1.392(12) |
| N(3)-C(19)                                             | 1.372(9)  | C(34)-C(35) | 1.445(10) |
| N(4)-C(24)                                             | 1.358(9)  | C(35)-C(36) | 1.397(11) |
| N(4)-N(5)                                              | 1.369(8)  | C(36)-C(37) | 1.379(13) |
| N(4)-C(14)                                             | 1.487(9)  | C(37)-C(38) | 1.416(13) |
| N(5)-C(26)                                             | 1.347(8)  | C(38)-C(39) | 1.392(12) |
| N(6)-C(31)                                             | 1.315(9)  | C(40)-C(41) | 1.405(12) |
| N(6)-C(27)                                             | 1.345(10) | C(40)-C(47) | 1.495(12) |
| N(7)-C(32)                                             | 1.309(10) | C(41)-C(42) | 1.512(11) |
| N(7)-N(8)                                              | 1.369(8)  | C(42)-C(43) | 1.550(11) |
| N(7)-C(15)                                             | 1.477(9)  | C(43)-C(44) | 1.489(13) |
| N(8)-C(34)                                             | 1.341(9)  | C(44)-C(45) | 1.392(13) |
| N(9)-C(39)                                             | 1.340(9)  | C(45)-C(46) | 1.519(12) |
| N(9)-C(35)                                             | 1.371(10) | C(46)-C(47) | 1.530(11) |
| C(1)-C(6)                                              | 1.392(9)  | C(48)-C(49) | 1.511(14) |
| C(1)-C(2)                                              | 1.405(10) | C(48)-C(55) | 1.553(11) |
| C(1)-C(7)                                              | 1.513(10) | C(49)-C(50) | 1.502(12) |
| C(2)-C(3)                                              | 1.412(11) | C(50)-C(51) | 1.417(11) |
| C(2)-C(13)                                             | 1.506(9)  | C(51)-C(52) | 1.533(11) |
| C(3)-C(4)                                              | 1.389(10) | C(52)-C(53) | 1.535(11) |

|                |           |                 |         |
|----------------|-----------|-----------------|---------|
| C(53)-C(54)    | 1.500(11) | N(02)-C(05B)#1  | 1.49(2) |
| C(54)-C(55)    | 1.368(12) | C(05A)-C(05B)   | 0.72(3) |
| C(56)-C(57)    | 1.398(16) | C(05A)-O(06B)#1 | 1.65(4) |
| C(56)-C(63)    | 1.517(15) | C(05A)-O(07B)   | 1.72(3) |
| C(57)-C(58)    | 1.495(14) | O(06A)-O(07B)   | 0.68(3) |
| C(58)-C(59)    | 1.432(14) | O(06A)-O(06B)   | 1.16(3) |
| C(59)-C(60)    | 1.535(12) | O(07A)-O(06B)   | 1.17(3) |
| C(60)-C(61)    | 1.429(13) | O(07A)-C(05B)   | 1.45(3) |
| C(61)-C(62)    | 1.504(13) | O(07A)-O(07B)#1 | 1.59(3) |
| C(62)-C(63)    | 1.498(15) | O(06B)-C(05A)#1 | 1.65(4) |
| B(1)-F(3)      | 1.370(10) | O(06B)-O(07B)   | 1.69(3) |
| B(1)-F(1)      | 1.371(11) | O(07B)-O(07A)#1 | 1.59(3) |
| B(1)-F(2)      | 1.378(11) |                 |         |
| B(1)-F(4)      | 1.395(11) |                 |         |
| B(2)-F(6)      | 1.331(14) |                 |         |
| B(2)-F(8)      | 1.345(15) |                 |         |
| B(2)-F(7)      | 1.371(11) |                 |         |
| B(2)-F(5)      | 1.391(13) |                 |         |
| B(3)-F(12A)    | 1.23(7)   |                 |         |
| B(3)-F(11B)    | 1.24(3)   |                 |         |
| B(3)-F(9)      | 1.25(2)   |                 |         |
| B(3)-F(10A)    | 1.28(3)   |                 |         |
| B(3)-F(10B)    | 1.47(6)   |                 |         |
| B(3)-F(11A)    | 1.49(3)   |                 |         |
| B(3)-F(12B)    | 1.55(4)   |                 |         |
| C(01)-N(01)    | 1.405(15) |                 |         |
| N(01)-O(01)    | 1.083(13) |                 |         |
| N(01)-O(02)    | 1.299(15) |                 |         |
| N(03)-O(06)    | 1.18(3)   |                 |         |
| N(03)-C(03A)   | 1.22(5)   |                 |         |
| N(03)-O(05B)   | 1.27(4)   |                 |         |
| N(03)-C(03B)   | 1.46(4)   |                 |         |
| N(03)-O(05A)   | 1.55(3)   |                 |         |
| N(02)-O(06B)   | 1.39(3)   |                 |         |
| N(02)-O(06B)#1 | 1.39(3)   |                 |         |
| N(02)-O(07B)#1 | 1.394(19) |                 |         |
| N(02)-O(07B)   | 1.394(19) |                 |         |
| N(02)-O(07A)   | 1.40(3)   |                 |         |
| N(02)-O(07A)#1 | 1.40(3)   |                 |         |
| N(02)-C(05A)   | 1.46(2)   |                 |         |
| N(02)-C(05A)#1 | 1.46(2)   |                 |         |
| N(02)-O(06A)   | 1.47(2)   |                 |         |
| N(02)-O(06A)#1 | 1.47(2)   |                 |         |
| N(02)-C(05B)   | 1.49(2)   |                 |         |

Table S7. Bond angles [deg] for **2**.

|                   |          |                   |          |
|-------------------|----------|-------------------|----------|
| N(3)-Rh(1)-C(61)  | 91.9(3)  | N(9)-Rh(3)-C(41)  | 162.3(3) |
| N(3)-Rh(1)-N(2)   | 78.8(2)  | C(44)-Rh(3)-C(41) | 80.7(3)  |
| C(61)-Rh(1)-N(2)  | 156.1(3) | C(40)-Rh(3)-C(41) | 38.1(3)  |
| N(3)-Rh(1)-C(56)  | 161.7(5) | C(16)-N(1)-N(2)   | 110.9(6) |
| C(61)-Rh(1)-C(56) | 81.2(4)  | C(16)-N(1)-C(13)  | 125.4(6) |
| N(2)-Rh(1)-C(56)  | 100.7(3) | N(2)-N(1)-C(13)   | 123.5(5) |
| N(3)-Rh(1)-C(60)  | 94.7(3)  | N(1)-N(2)-C(18)   | 105.5(5) |
| C(61)-Rh(1)-C(60) | 39.1(3)  | N(1)-N(2)-Rh(1)   | 142.5(5) |
| N(2)-Rh(1)-C(60)  | 162.1(3) | C(18)-N(2)-Rh(1)  | 111.9(5) |
| C(56)-Rh(1)-C(60) | 90.7(4)  | C(23)-N(3)-C(19)  | 117.6(7) |
| N(3)-Rh(1)-C(57)  | 160.2(4) | C(23)-N(3)-Rh(1)  | 128.2(5) |
| C(61)-Rh(1)-C(57) | 96.9(4)  | C(19)-N(3)-Rh(1)  | 113.7(5) |
| N(2)-Rh(1)-C(57)  | 99.0(3)  | C(24)-N(4)-N(5)   | 109.6(6) |
| C(56)-Rh(1)-C(57) | 38.1(4)  | C(24)-N(4)-C(14)  | 128.0(6) |
| C(60)-Rh(1)-C(57) | 81.4(4)  | N(5)-N(4)-C(14)   | 122.2(6) |
| C(54)-Rh(2)-N(5)  | 157.1(3) | C(26)-N(5)-N(4)   | 104.7(6) |
| C(54)-Rh(2)-N(6)  | 94.9(3)  | C(26)-N(5)-Rh(2)  | 113.4(5) |
| N(5)-Rh(2)-N(6)   | 78.4(2)  | N(4)-N(5)-Rh(2)   | 141.4(4) |
| C(54)-Rh(2)-C(55) | 37.7(3)  | C(31)-N(6)-C(27)  | 119.0(6) |
| N(5)-Rh(2)-C(55)  | 162.6(3) | C(31)-N(6)-Rh(2)  | 126.4(5) |
| N(6)-Rh(2)-C(55)  | 93.5(3)  | C(27)-N(6)-Rh(2)  | 114.1(4) |
| C(54)-Rh(2)-C(50) | 97.5(3)  | C(32)-N(7)-N(8)   | 111.2(6) |
| N(5)-Rh(2)-C(50)  | 98.1(3)  | C(32)-N(7)-C(15)  | 125.3(6) |
| N(6)-Rh(2)-C(50)  | 153.1(3) | N(8)-N(7)-C(15)   | 123.4(6) |
| C(55)-Rh(2)-C(50) | 82.1(3)  | C(34)-N(8)-N(7)   | 104.0(6) |
| C(54)-Rh(2)-C(51) | 81.6(3)  | C(34)-N(8)-Rh(3)  | 112.8(5) |
| N(5)-Rh(2)-C(51)  | 100.6(3) | N(7)-N(8)-Rh(3)   | 143.2(5) |
| N(6)-Rh(2)-C(51)  | 168.5(3) | C(39)-N(9)-C(35)  | 119.3(7) |
| C(55)-Rh(2)-C(51) | 90.3(3)  | C(39)-N(9)-Rh(3)  | 127.2(6) |
| C(50)-Rh(2)-C(51) | 38.4(3)  | C(35)-N(9)-Rh(3)  | 113.4(5) |
| N(8)-Rh(3)-C(45)  | 164.4(3) | C(6)-C(1)-C(2)    | 119.5(7) |
| N(8)-Rh(3)-N(9)   | 78.8(2)  | C(6)-C(1)-C(7)    | 120.4(6) |
| C(45)-Rh(3)-N(9)  | 95.7(3)  | C(2)-C(1)-C(7)    | 120.1(6) |
| N(8)-Rh(3)-C(44)  | 155.1(3) | C(1)-C(2)-C(3)    | 120.1(6) |
| C(45)-Rh(3)-C(44) | 38.2(4)  | C(1)-C(2)-C(13)   | 120.6(7) |
| N(9)-Rh(3)-C(44)  | 92.2(3)  | C(3)-C(2)-C(13)   | 119.3(7) |
| N(8)-Rh(3)-C(40)  | 98.8(3)  | C(4)-C(3)-C(2)    | 119.8(7) |
| C(45)-Rh(3)-C(40) | 81.2(3)  | C(4)-C(3)-C(9)    | 119.8(7) |
| N(9)-Rh(3)-C(40)  | 159.5(3) | C(2)-C(3)-C(9)    | 120.3(7) |
| C(44)-Rh(3)-C(40) | 97.5(3)  | C(3)-C(4)-C(5)    | 120.7(7) |
| N(8)-Rh(3)-C(41)  | 101.0(3) | C(3)-C(4)-C(14)   | 119.4(7) |
| C(45)-Rh(3)-C(41) | 88.7(3)  | C(5)-C(4)-C(14)   | 119.9(6) |
|                   |          | C(6)-C(5)-C(4)    | 118.7(6) |
|                   |          | C(6)-C(5)-C(11)   | 121.0(6) |

|                   |          |                   |           |
|-------------------|----------|-------------------|-----------|
| C(4)-C(5)-C(11)   | 120.3(7) | C(39)-C(38)-C(37) | 118.8(8)  |
| C(1)-C(6)-C(5)    | 121.2(6) | N(9)-C(39)-C(38)  | 122.0(8)  |
| C(1)-C(6)-C(15)   | 120.5(7) | C(41)-C(40)-C(47) | 124.6(8)  |
| C(5)-C(6)-C(15)   | 118.3(6) | C(41)-C(40)-Rh(3) | 71.4(4)   |
| C(1)-C(7)-C(8)    | 112.6(7) | C(47)-C(40)-Rh(3) | 110.8(5)  |
| C(3)-C(9)-C(10)   | 111.9(7) | C(40)-C(41)-C(42) | 123.0(9)  |
| C(12)-C(11)-C(5)  | 110.8(6) | C(40)-C(41)-Rh(3) | 70.5(4)   |
| N(1)-C(13)-C(2)   | 111.3(5) | C(42)-C(41)-Rh(3) | 113.5(5)  |
| N(4)-C(14)-C(4)   | 110.6(6) | C(41)-C(42)-C(43) | 110.7(6)  |
| N(7)-C(15)-C(6)   | 111.3(5) | C(44)-C(43)-C(42) | 112.1(7)  |
| N(1)-C(16)-C(17)  | 107.6(7) | C(45)-C(44)-C(43) | 126.3(8)  |
| C(16)-C(17)-C(18) | 105.8(7) | C(45)-C(44)-Rh(3) | 70.6(4)   |
| N(2)-C(18)-C(17)  | 110.2(7) | C(43)-C(44)-Rh(3) | 110.8(5)  |
| N(2)-C(18)-C(19)  | 119.2(6) | C(44)-C(45)-C(46) | 126.0(9)  |
| C(17)-C(18)-C(19) | 130.5(7) | C(44)-C(45)-Rh(3) | 71.2(5)   |
| N(3)-C(19)-C(20)  | 121.6(7) | C(46)-C(45)-Rh(3) | 113.7(5)  |
| N(3)-C(19)-C(18)  | 115.9(6) | C(45)-C(46)-C(47) | 112.8(7)  |
| C(20)-C(19)-C(18) | 122.5(7) | C(40)-C(47)-C(46) | 113.2(7)  |
| C(21)-C(20)-C(19) | 118.4(8) | C(49)-C(48)-C(55) | 111.2(7)  |
| C(22)-C(21)-C(20) | 121.0(8) | C(50)-C(49)-C(48) | 114.7(7)  |
| C(21)-C(22)-C(23) | 118.8(9) | C(51)-C(50)-C(49) | 125.2(8)  |
| N(3)-C(23)-C(22)  | 122.5(8) | C(51)-C(50)-Rh(2) | 71.6(4)   |
| C(25)-C(24)-N(4)  | 108.4(7) | C(49)-C(50)-Rh(2) | 109.3(6)  |
| C(24)-C(25)-C(26) | 106.3(7) | C(50)-C(51)-C(52) | 121.6(8)  |
| N(5)-C(26)-C(25)  | 111.0(6) | C(50)-C(51)-Rh(2) | 70.0(4)   |
| N(5)-C(26)-C(27)  | 117.6(7) | C(52)-C(51)-Rh(2) | 111.6(5)  |
| C(25)-C(26)-C(27) | 131.4(7) | C(51)-C(52)-C(53) | 111.7(6)  |
| N(6)-C(27)-C(28)  | 122.7(7) | C(54)-C(53)-C(52) | 111.9(7)  |
| N(6)-C(27)-C(26)  | 115.4(6) | C(55)-C(54)-C(53) | 127.7(7)  |
| C(28)-C(27)-C(26) | 121.8(8) | C(55)-C(54)-Rh(2) | 72.1(5)   |
| C(27)-C(28)-C(29) | 118.4(8) | C(53)-C(54)-Rh(2) | 111.0(5)  |
| C(30)-C(29)-C(28) | 120.1(7) | C(54)-C(55)-C(48) | 122.7(7)  |
| C(29)-C(30)-C(31) | 117.2(8) | C(54)-C(55)-Rh(2) | 70.3(5)   |
| N(6)-C(31)-C(30)  | 122.5(8) | C(48)-C(55)-Rh(2) | 112.8(5)  |
| N(7)-C(32)-C(33)  | 109.5(7) | C(57)-C(56)-C(63) | 123.1(12) |
| C(32)-C(33)-C(34) | 103.9(7) | C(57)-C(56)-Rh(1) | 71.4(5)   |
| N(8)-C(34)-C(33)  | 111.4(7) | C(63)-C(56)-Rh(1) | 113.8(7)  |
| N(8)-C(34)-C(35)  | 119.3(7) | C(56)-C(57)-C(58) | 123.0(11) |
| C(33)-C(34)-C(35) | 129.3(7) | C(56)-C(57)-Rh(1) | 70.5(5)   |
| N(9)-C(35)-C(36)  | 121.6(7) | C(58)-C(57)-Rh(1) | 109.3(7)  |
| N(9)-C(35)-C(34)  | 115.6(7) | C(59)-C(58)-C(57) | 117.8(9)  |
| C(36)-C(35)-C(34) | 122.8(8) | C(58)-C(59)-C(60) | 113.6(8)  |
| C(37)-C(36)-C(35) | 119.0(9) | C(61)-C(60)-C(59) | 123.0(9)  |
| C(36)-C(37)-C(38) | 119.2(8) | C(61)-C(60)-Rh(1) | 70.1(4)   |

|                    |           |                         |           |
|--------------------|-----------|-------------------------|-----------|
| C(59)-C(60)-Rh(1)  | 112.1(6)  | C(03A)-N(03)-O(05B)     | 57(3)     |
| C(60)-C(61)-C(62)  | 124.4(9)  | O(06)-N(03)-C(03B)      | 154(3)    |
| C(60)-C(61)-Rh(1)  | 70.8(4)   | C(03A)-N(03)-C(03B)     | 51(3)     |
| C(62)-C(61)-Rh(1)  | 110.7(6)  | O(05B)-N(03)-C(03B)     | 105(4)    |
| C(63)-C(62)-C(61)  | 115.1(9)  | O(06)-N(03)-O(05A)      | 91(2)     |
| C(62)-C(63)-C(56)  | 112.3(9)  | C(03A)-N(03)-O(05A)     | 114(4)    |
| F(3)-B(1)-F(1)     | 111.7(8)  | O(05B)-N(03)-O(05A)     | 162(3)    |
| F(3)-B(1)-F(2)     | 107.7(7)  | C(03B)-N(03)-O(05A)     | 63(2)     |
| F(1)-B(1)-F(2)     | 111.1(8)  | O(06B)-N(02)-O(06B)#1   | 180.0(19) |
| F(3)-B(1)-F(4)     | 110.3(8)  | O(06B)-N(02)-O(07B)#1   | 105.2(14) |
| F(1)-B(1)-F(4)     | 108.6(7)  | O(06B)#1-N(02)-O(07B)#1 | 74.8(14)  |
| F(2)-B(1)-F(4)     | 107.4(8)  | O(06B)-N(02)-O(07B)     | 74.8(14)  |
| F(6)-B(2)-F(8)     | 106.3(11) | O(06B)#1-N(02)-O(07B)   | 105.2(14) |
| F(6)-B(2)-F(7)     | 112.8(11) | O(07B)#1-N(02)-O(07B)   | 180(2)    |
| F(8)-B(2)-F(7)     | 107.4(10) | O(06B)-N(02)-O(07A)     | 49.6(14)  |
| F(6)-B(2)-F(5)     | 110.1(9)  | O(06B)#1-N(02)-O(07A)   | 130.4(14) |
| F(8)-B(2)-F(5)     | 110.2(11) | O(07B)#1-N(02)-O(07A)   | 69.2(14)  |
| F(7)-B(2)-F(5)     | 110.0(9)  | O(07B)-N(02)-O(07A)     | 110.8(14) |
| F(12A)-B(3)-F(11B) | 51(3)     | O(06B)-N(02)-O(07A)#1   | 130.4(14) |
| F(12A)-B(3)-F(9)   | 128(4)    | O(06B)#1-N(02)-O(07A)#1 | 49.6(14)  |
| F(11B)-B(3)-F(9)   | 102(3)    | O(07B)#1-N(02)-O(07A)#1 | 110.8(14) |
| F(12A)-B(3)-F(10A) | 112(4)    | O(07B)-N(02)-O(07A)#1   | 69.2(14)  |
| F(11B)-B(3)-F(10A) | 158(3)    | O(07A)-N(02)-O(07A)#1   | 180.0(17) |
| F(9)-B(3)-F(10A)   | 99.5(17)  | O(06B)-N(02)-C(05A)     | 109.4(14) |
| F(12A)-B(3)-F(10B) | 123(4)    | O(06B)#1-N(02)-C(05A)   | 70.6(14)  |
| F(11B)-B(3)-F(10B) | 132(3)    | O(07B)#1-N(02)-C(05A)   | 105.9(13) |
| F(9)-B(3)-F(10B)   | 108(2)    | O(07B)-N(02)-C(05A)     | 74.1(13)  |
| F(10A)-B(3)-F(10B) | 41(2)     | O(07A)-N(02)-C(05A)     | 87.6(15)  |
| F(12A)-B(3)-F(11A) | 93(4)     | O(07A)#1-N(02)-C(05A)   | 92.4(15)  |
| F(11B)-B(3)-F(11A) | 64.7(17)  | O(06B)-N(02)-C(05A)#1   | 70.6(14)  |
| F(9)-B(3)-F(11A)   | 117(2)    | O(06B)#1-N(02)-C(05A)#1 | 109.4(14) |
| F(10A)-B(3)-F(11A) | 108(2)    | O(07B)#1-N(02)-C(05A)#1 | 74.1(13)  |
| F(10B)-B(3)-F(11A) | 69(2)     | O(07B)-N(02)-C(05A)#1   | 105.9(13) |
| F(12A)-B(3)-F(12B) | 46(3)     | O(07A)-N(02)-C(05A)#1   | 92.4(15)  |
| F(11B)-B(3)-F(12B) | 95(2)     | O(07A)#1-N(02)-C(05A)#1 | 87.6(14)  |
| F(9)-B(3)-F(12B)   | 137.4(17) | C(05A)-N(02)-C(05A)#1   | 180(2)    |
| F(10A)-B(3)-F(12B) | 65.5(18)  | O(06B)-N(02)-O(06A)     | 47.9(14)  |
| F(10B)-B(3)-F(12B) | 87(3)     | O(06B)#1-N(02)-O(06A)   | 132.1(14) |
| F(11A)-B(3)-F(12B) | 106(2)    | O(07B)#1-N(02)-O(06A)   | 152.6(11) |
| O(01)-N(01)-O(02)  | 117.4(14) | O(07B)-N(02)-O(06A)     | 27.4(11)  |
| O(01)-N(01)-C(01)  | 126.0(17) | O(07A)-N(02)-O(06A)     | 90.3(15)  |
| O(02)-N(01)-C(01)  | 116.1(13) | O(07A)#1-N(02)-O(06A)   | 89.7(15)  |
| O(06)-N(03)-C(03A) | 153(4)    | C(05A)-N(02)-O(06A)     | 90.5(13)  |
| O(06)-N(03)-O(05B) | 102(3)    | C(05A)#1-N(02)-O(06A)   | 89.5(13)  |

|                         |            |                                                             |           |
|-------------------------|------------|-------------------------------------------------------------|-----------|
| O(06B)-N(02)-O(06A)#1   | 132.1(14)  | C(05B)-O(07A)-O(07B)#1                                      | 84.3(18)  |
| O(06B)#1-N(02)-O(06A)#1 | 47.9(14)   | C(05A)-C(05B)-O(07A)                                        | 130(3)    |
| O(07B)#1-N(02)-O(06A)#1 | 27.4(11)   | C(05A)-C(05B)-N(02)                                         | 74(3)     |
| O(07B)-N(02)-O(06A)#1   | 152.6(11)  | O(07A)-C(05B)-N(02)                                         | 57.0(13)  |
| O(07A)-N(02)-O(06A)#1   | 89.7(15)   | O(06A)-O(06B)-O(07A)                                        | 122(3)    |
| O(07A)#1-N(02)-O(06A)#1 | 90.3(15)   | O(06A)-O(06B)-N(02)                                         | 69.7(19)  |
| C(05A)-N(02)-O(06A)#1   | 89.5(13)   | O(07A)-O(06B)-N(02)                                         | 65.9(19)  |
| C(05A)#1-N(02)-O(06A)#1 | 90.5(13)   | O(06A)-O(06B)-C(05A)#1                                      | 93(2)     |
| O(06A)-N(02)-O(06A)#1   | 180.000(4) | O(07A)-O(06B)-C(05A)#1                                      | 93(2)     |
| O(06B)-N(02)-C(05B)     | 92.3(14)   | N(02)-O(06B)-C(05A)#1                                       | 56.8(13)  |
| O(06B)#1-N(02)-C(05B)   | 87.7(14)   | O(06A)-O(06B)-O(07B)                                        | 17.6(15)  |
| O(07B)#1-N(02)-C(05B)   | 90.0(12)   | O(07A)-O(06B)-O(07B)                                        | 106(2)    |
| O(07B)-N(02)-C(05B)     | 90.0(12)   | N(02)-O(06B)-O(07B)                                         | 52.8(11)  |
| O(07A)-N(02)-C(05B)     | 60.0(14)   | C(05A)#1-O(06B)-O(07B)                                      | 86.2(17)  |
| O(07A)#1-N(02)-C(05B)   | 120.0(14)  | O(06A)-O(07B)-N(02)                                         | 82(3)     |
| C(05A)-N(02)-C(05B)     | 28.0(11)   | O(06A)-O(07B)-O(07A)#1                                      | 121(3)    |
| C(05A)#1-N(02)-C(05B)   | 152.0(11)  | N(02)-O(07B)-O(07A)#1                                       | 55.7(12)  |
| O(06A)-N(02)-C(05B)     | 95.2(13)   | O(06A)-O(07B)-O(06B)                                        | 31(3)     |
| O(06A)#1-N(02)-C(05B)   | 84.8(13)   | N(02)-O(07B)-O(06B)                                         | 52.4(11)  |
| O(06B)-N(02)-C(05B)#1   | 87.7(14)   | O(07A)#1-O(07B)-O(06B)                                      | 101.1(17) |
| O(06B)#1-N(02)-C(05B)#1 | 92.3(14)   | O(06A)-O(07B)-C(05A)                                        | 113(3)    |
| O(07B)#1-N(02)-C(05B)#1 | 90.0(12)   | N(02)-O(07B)-C(05A)                                         | 54.8(10)  |
| O(07B)-N(02)-C(05B)#1   | 90.0(12)   | O(07A)#1-O(07B)-C(05A)                                      | 77.2(15)  |
| O(07A)-N(02)-C(05B)#1   | 120.0(14)  | O(06B)-O(07B)-C(05A) 8                                      | 6.0(16)   |
| O(07A)#1-N(02)-C(05B)#1 | 60.0(14)   |                                                             |           |
| C(05A)-N(02)-C(05B)#1   | 152.0(11)  | Symmetry transformations used to generate equivalent atoms: |           |
| C(05A)#1-N(02)-C(05B)#1 | 28.0(11)   | #1 -x+1,-y+1,-z                                             |           |
| O(06A)-N(02)-C(05B)#1   | 84.8(13)   |                                                             |           |
| O(06A)#1-N(02)-C(05B)#1 | 95.2(13)   |                                                             |           |
| C(05B)-N(02)-C(05B)#1   | 180(2)     |                                                             |           |
| C(05B)-C(05A)-N(02)     | 78(3)      |                                                             |           |
| C(05B)-C(05A)-O(06B)#1  | 109(3)     |                                                             |           |
| N(02)-C(05A)-O(06B)#1   | 52.6(12)   |                                                             |           |
| C(05B)-C(05A)-O(07B)    | 106(3)     |                                                             |           |
| N(02)-C(05A)-O(07B)     | 51.2(10)   |                                                             |           |
| O(06B)#1-C(05A)-O(07B)  | 81.9(15)   |                                                             |           |
| O(07B)-O(06A)-O(06B)    | 131(4)     |                                                             |           |
| O(07B)-O(06A)-N(02)     | 70(3)      |                                                             |           |
| O(06B)-O(06A)-N(02)     | 62.4(18)   |                                                             |           |
| O(06B)-O(07A)-N(02)     | 64.5(19)   |                                                             |           |
| O(06B)-O(07A)-C(05B)    | 104(2)     |                                                             |           |
| N(02)-O(07A)-C(05B)     | 63.0(15)   |                                                             |           |
| O(06B)-O(07A)-O(07B)#1  | 105(2)     |                                                             |           |
| N(02)-O(07A)-O(07B)#1   | 55.1(12)   |                                                             |           |
